# Supplementary material for: Modulation of the relaxation dynamics of linear-shaped tetranuclear rare-earth clusters through utilizing different solvents
Source: Royal Society of Chemistry journal article supplement (doi:10.1039/c6dt03500k), 2016-01-01
Supplement: c6dt03500k1.pdf [file c6dt03500k1.pdf]

## Electronic Supplementary Information

### Modulate the relaxation dynamics of linear-shaped tetranuclear rare-earth clusters through utilizing different solvents

Ru-Xia Zhang, Yi-Xin Chang, Hai-Yun Shen, Wen-Min Wang, Xiao-Pu Zhou, Ni-Ni Wang,  
Jian-Zhong Cui\* and Hong-Ling Gao\*

*Department of Chemistry, Tianjin University, Tianjin 300072, People's Republic of China*

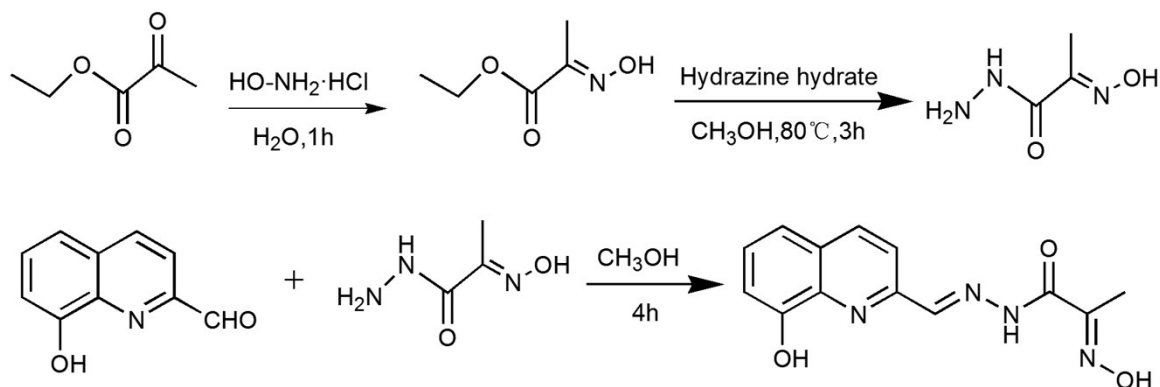

**Scheme S1.** The synthesis route for HL.

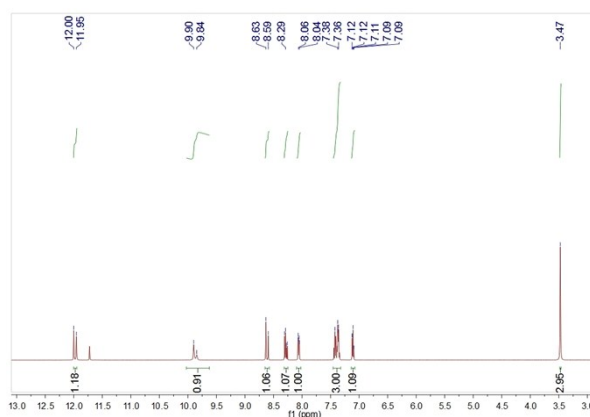

**Fig S1.** The <sup>1</sup>H NMR spectrum of 2-[(2-(hydroxyimino)-propanehydrazide)methyl]-8-hydroxyquinoline.

\* Department of Chemistry, Tianjin University, Tianjin 300072, P. R. China. E-mail: [cuijianzhong@tju.edu.cn](mailto:cuijianzhong@tju.edu.cn)

\* Department of Chemistry, Tianjin University, Tianjin 300072, P. R. China. E-mail: [ghl@tju.edu.cn](mailto:ghl@tju.edu.cn)

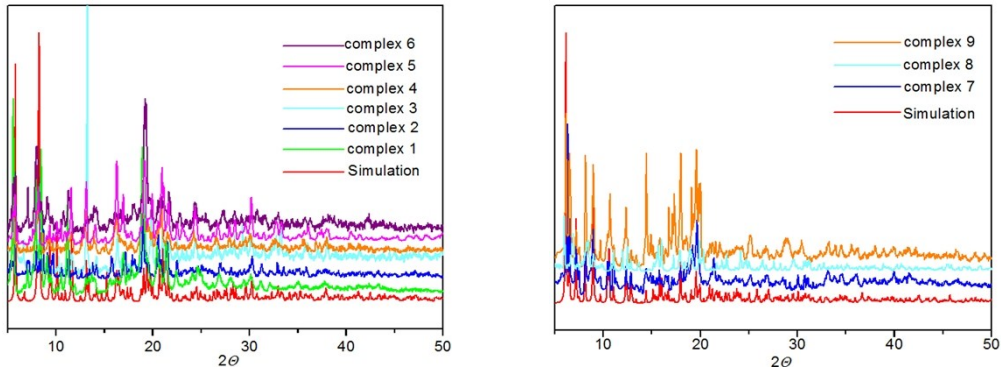

**Fig S2.** The experimental and simulated PXRD patterns of complexes 1–9.

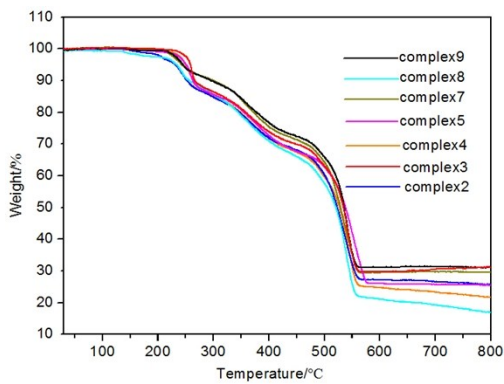

**Fig S3.** TG curves of complexes.

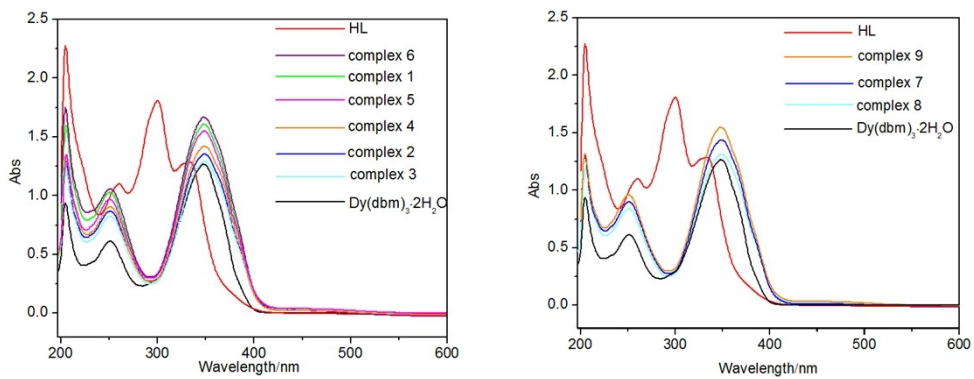

**Fig S4.** UV-vis absorption spectra of complexes 1–9, HL and Dy(dbm)<sub>3</sub>·2H<sub>2</sub>O.

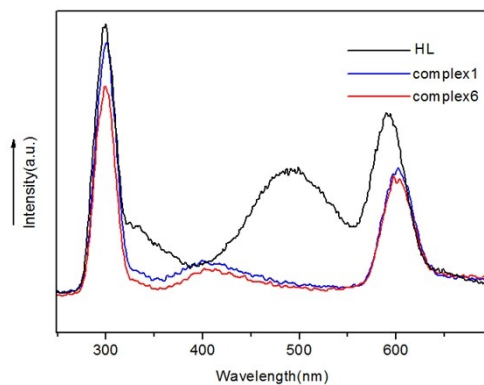

**Fig S5.** The luminescent spectra of HL, complexes **1** and **6**.

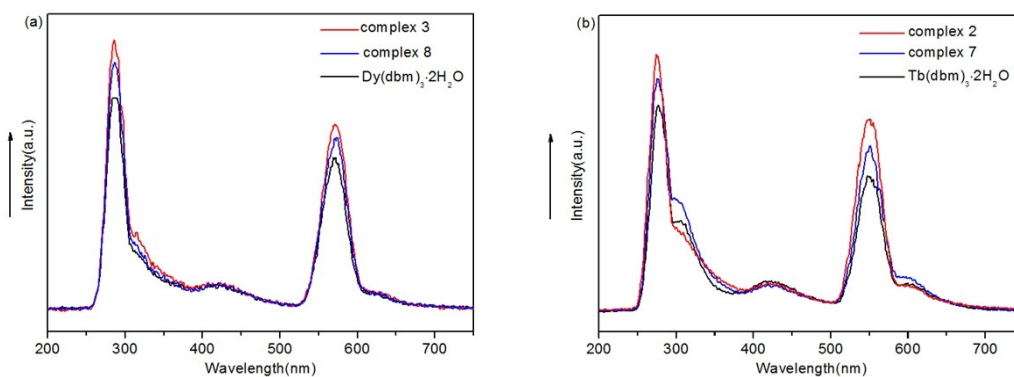

**Fig S6.** (a) The luminescent spectra of  $\text{Dy}(\text{dbm})_3 \cdot 2\text{H}_2\text{O}$ , complexes **3** and **8**; (b) The luminescent spectra of  $\text{Tb}(\text{dbm})_3 \cdot 2\text{H}_2\text{O}$ , complex **2** and **7**.

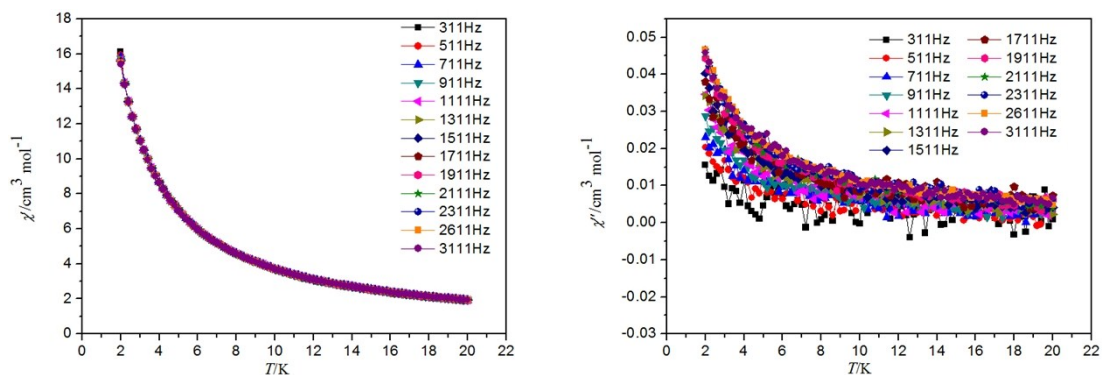

**Fig S7.** Temperature dependence of the *ac* susceptibility for complex **2** as a function of the temperature below 20 K under an oscillating *ac* field of 3 Oe.

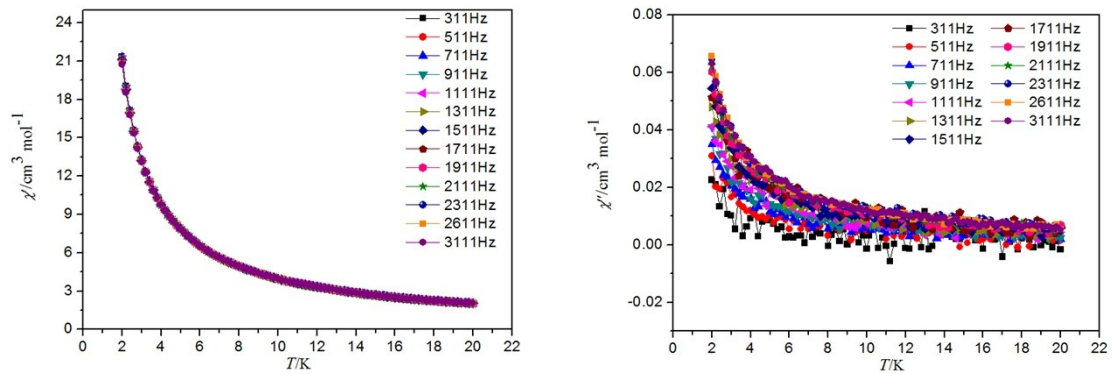

**Fig S8.** Temperature dependence of the *ac* susceptibility for complex **7** as a function of the temperature below 20 K under an oscillating *ac* field of 3 Oe.

**Table S1.** Selected bond lengths and angles for complexes **1–9**

| Complex     | 1          | 2          | 3          | 4          | 5         | 6          | 7          | 8          | 9          |
|-------------|------------|------------|------------|------------|-----------|------------|------------|------------|------------|
| RE1–O4      | 2.288(4)   | 2.316(8)   | 2.280(2)   | 2.294(3)   | 2.261(2)  | 2.222(8)   | 2.303(5)   | 2.3165(16) | 2.2754(15) |
| RE1–O5      | 2.299(4)   | 2.329(8)   | 2.307(2)   | 2.306(3)   | 2.289(2)  | 2.260(8)   | 2.304(5)   | 2.3272(15) | 2.2843(15) |
| RE1–O2      | 2.300(4)   | 2.312(8)   | 2.338(2)   | 2.313(3)   | 2.318(2)  | 2.286(9)   | 2.352(5)   | 2.3082(15) | 2.3348(15) |
| RE1–O12     | 2.336(4)   | 2.335(9)   | 2.356(2)   | 2.343(3)   | 2.344(2)  | 2.307(8)   | 2.460(5)   | 2.4215(16) | 2.4328(16) |
| RE1–O1      | 2.341(3)   | 2.357(7)   | 2.386(2)   | 2.343(3)   | 2.367(2)  | 2.342(8)   | 2.400(5)   | 2.3573(15) | 2.3704(15) |
| RE1–O1#1    | 2.367(3)   | 2.370(7)   | 2.3759(19) | 2.366(3)   | 2.357(2)  | 2.341(8)   | 2.368(5)   | 2.4392(15) | 2.3535(15) |
| RE1–N1      | 2.441(4)   | 2.467(9)   | 2.471(2)   | 2.448(4)   | 2.448(3)  | 2.435(10)  | 2.461(6)   | 2.4665(18) | 2.4479(17) |
| RE1–N2      | 2.535(4)   | 2.569(9)   | 2.532(2)   | 2.527(4)   | 2.516(3)  | 2.506(9)   | 2.544(7)   | 2.5430(18) | 2.5121(18) |
| RE1–RE1#1   | 3.8112(9)  | 3.8600(10) | 3.8392(4)  | 3.8210(4)  | 3.8165(3) | 3.7777(11) | 3.8894(8)  | 3.8277(4)  | 3.8519(2)  |
| RE2–O7      | 2.264(4)   | 2.293(9)   | 2.325(2)   | 2.275(3)   | 2.311(3)  | 2.270(10)  | 2.319(6)   | 2.3214(16) | 2.2949(16) |
| RE2–O8      | 2.298(3)   | 2.310(8)   | 2.315(2)   | 2.311(3)   | 2.293(2)  | 2.258(8)   | 2.288(6)   | 2.2933(16) | 2.2673(17) |
| RE2–O11     | 2.303(4)   | 2.311(8)   | 2.302(2)   | 2.303(3)   | 2.284(2)  | 2.242(8)   | 2.351(5)   | 2.3201(15) | 2.3179(16) |
| RE2–O10     | 2.313(4)   | 2.336(9)   | 2.356(2)   | 2.316(3)   | 2.349(3)  | 2.298(9)   | 2.312(5)   | 2.2999(15) | 2.2915(16) |
| RE2–O6      | 2.318(4)   | 2.349(8)   | 2.304(2)   | 2.329(3)   | 2.285(2)  | 2.274(9)   | 2.326(5)   | 2.2954(15) | 2.3040(16) |
| RE2–O9      | 2.383(3)   | 2.413(8)   | 2.348(2)   | 2.396(3)   | 2.334(2)  | 2.300(9)   | 2.436(6)   | 2.3514(15) | 2.4151(16) |
| RE2–N4      | 2.534(5)   | 2.555(10)  | 2.532(3)   | 2.529(4)   | 2.513(3)  | 2.477(10)  | 2.521(7)   | 2.5629(19) | 2.5024(19) |
| RE2–N3      | 2.545(4)   | 2.575(9)   | 2.540(2)   | 2.539(4)   | 2.520(3)  | 2.479(10)  | 2.563(7)   | 2.5872(18) | 2.5445(18) |
| O4–RE1–O5   | 71.94(13)  | 71.2(3)    | 72.58(7)   | 72.32(11)  | 73.37(8)  | 73.7(3)    | 72.69(19)  | 72.76(6)   | 73.08(6)   |
| O4–RE1–O2   | 90.87(13)  | 89.7(3)    | 96.26(8)   | 90.59(11)  | 96.86(9)  | 96.0(3)    | 89.9(2)    | 89.11(6)   | 90.34(6)   |
| O5–RE1–O2   | 79.85(13)  | 79.7(3)    | 82.58(7)   | 79.23(11)  | 81.64(8)  | 80.8(3)    | 84.92(19)  | 86.81(5)   | 83.94(6)   |
| O4–RE1–O12  | 141.77(13) | 142.8(3)   | 140.71(7)  | 142.03(12) | 140.37(8) | 140.4(3)   | 146.61(19) | 143.76(5)  | 146.55(6)  |
| O5–RE1–O12  | 144.57(13) | 143.7(3)   | 145.83(7)  | 143.39(12) | 145.36(8) | 144.6(3)   | 138.02(19) | 143.47(5)  | 137.69(6)  |
| O2–RE1–O12  | 87.55(15)  | 86.7(3)    | 85.26(8)   | 86.75(13)  | 85.44(9)  | 85.2(3)    | 82.22(18)  | 93.10(6)   | 82.50(6)   |
| O4–RE1–O1   | 93.16(12)  | 94.5(3)    | 88.89(7)   | 93.61(11)  | 88.67(9)  | 90.0(3)    | 91.58(19)  | 104.01(5)  | 91.82(6)   |
| O5–RE1–O1   | 89.06(12)  | 90.6(3)    | 88.29(7)   | 89.59(10)  | 88.05(8)  | 87.9(3)    | 83.93(19)  | 89.04(5)   | 83.84(5)   |
| O2–RE1–O1   | 166.40(12) | 167.6(3)   | 167.65(7)  | 166.26(10) | 166.34(8) | 165.2(3)   | 167.75(18) | 164.40(5)  | 166.39(5)  |
| O12–RE1–O1  | 97.20(13)  | 96.8(3)    | 97.87(7)   | 97.83(12)  | 98.26(8)  | 98.8(3)    | 102.85(18) | 81.37(5)   | 102.72(5)  |
| O4–RE1–O1#1 | 141.97(12) | 141.3(3)   | 142.13(7)  | 142.26(11) | 142.17(8) | 142.2(3)   | 144.14(18) | 144.40(5)  | 144.39(6)  |
| O5–RE1–O1#1 | 73.02(12)  | 73.4(3)    | 74.12(7)   | 73.07(10)  | 73.64(8)  | 72.4(3)    | 74.56(18)  | 71.67(5)   | 74.31(5)   |
| O2–RE1–O1#1 | 97.13(12)  | 99.1(3)    | 96.85(7)   | 97.35(10)  | 96.17(8)  | 94.9(3)    | 101.38(18) | 90.29(5)   | 100.11(5)  |

|              |                 |          |           |            |            |          |            |           |           |       |
|--------------|-----------------|----------|-----------|------------|------------|----------|------------|-----------|-----------|-------|
| O12-RE1-O1#1 | 75.92(12)       | 75.7(3)  | 75.81(7)  | 75.47(11)  | 76.00(8)   | 76.6(3)  | 69.17(18)  | 71.80(5)  | 68.99(5)  |       |
| O1-RE1-O1#1  | 71.90(13)       | 70.5(3)  | 72.54(8)  | 71.52(11)  | 72.21(9)   | 72.5(3)  | 70.70(19)  | 74.13(6)  | 70.75(6)  |       |
| O7-RE2-O8    | 91.27(14)       | 88.6(3)  | 82.70(8)  | 90.14(12)  | 83.51(9)   | 83.5(3)  | 97.0(2)    | 85.58(6)  | 96.55(6)  |       |
| O7-RE2-O11   | 147.93(14)      | 147.1(3) | 143.53(8) | 147.62(12) | 144.37(9)  | 143.6(3) | 152.46(19) | 142.83(5) | 152.21(6) |       |
| O8-RE2-O11   | 83.70(13)       | 84.5(3)  | 77.00(8)  | 83.76(11)  | 76.39(8)   | 76.4(3)  | 76.2(2)    | 75.98(6)  | 75.84(6)  |       |
| O7-RE2-O10   | 139.39(14)      | 140.6(3) | 143.37(9) | 139.63(12) | 142.17(9)  | 142.3(4) | 135.6(2)   | 145.12(5) | 135.34(6) |       |
| O8-RE2-O10   | 103.46(14)      | 105.6(3) | 100.96(8) | 104.08(12) | 102.11(9)  | 102.2(3) | 93.0(2)    | 107.13(6) | 93.94(6)  |       |
| O11-RE2-O10  | 72.17(13)       | 71.9(3)  | 71.08(8)  | 72.39(11)  | 71.75(9)   | 72.5(3)  | 71.88(19)  | 71.93(5)  | 72.35(6)  |       |
| O7-RE2-O6    | 73.02(14)       | 72.8(3)  | 71.92(8)  | 73.07(12)  | 72.55(9)   | 72.7(4)  | 71.74(19)  | 71.71(5)  | 72.38(6)  |       |
| O8-RE2-O6    | 74.81(13)       | 73.8(3)  | 79.57(8)  | 74.50(11)  | 78.37(9)   | 79.2(3)  | 85.3(2)    | 82.03(6)  | 83.92(6)  |       |
| O11-RE2-O6   | 75.10(13)       | 74.4(3)  | 74.80(8)  | 74.66(12)  | 74.75(9)   | 73.9(3)  | 81.04(18)  | 73.93(6)  | 80.19(6)  |       |
| O10-RE2-O6   | 147.20(14)      | 146.2(3) | 144.72(8) | 146.95(11) | 145.27(9)  | 145.0(3) | 152.45(19) | 140.96(5) | 152.09(6) |       |
| O7-RE2-O9    | 75.73(14)       | 75.6(3)  | 74.29(9)  | 75.41(12)  | 73.77(10)  | 74.5(4)  | 70.81(19)  | 75.02(6)  | 70.72(6)  |       |
| O8-RE2-O9    | 71.04(13)       | 71.0(3)  | 72.11(8)  | 71.37(11)  | 72.67(8)   | 72.8(3)  | 71.5(2)    | 72.47(6)  | 72.01(6)  |       |
| O11-RE2-O9   | 130.94(13)      | 131.1(3) | 125.67(8) | 131.14(11) | 125.59(9)  | 125.8(3) | 129.18(18) | 127.03(6) | 129.09(6) |       |
| O10-RE2-O9   | 73.86(13)       | 74.9(3)  | 72.38(9)  | 73.91(11)  | 72.48(9)   | 71.9(4)  | 71.76(19)  | 78.15(5)  | 71.67(6)  |       |
| O6-RE2-O9    | 132.50(13)      | 132.5(3) | 138.05(8) | 132.81(11) | 137.44(9)  | 138.7(3) | 132.50(19) | 139.22(6) | 132.63(6) |       |
| symmetry     | transformations | used     | to        | generate   | equivalent | atoms:   | #1         | -x+1,     | -y+1,     | -z+1. |

**Table S2.** The parameters obtained from Cole-Cole plots using the Debye model.

| Slow Relaxation (SR) |          |          |          |
|----------------------|----------|----------|----------|
| <i>T</i> / K         | $\chi_1$ | $\chi_2$ | $\alpha$ |
| 2                    | 3.11053  | 11.38135 | 0.39272  |
| 3                    | 2.95191  | 8.15161  | 0.32036  |
| 4                    | 2.63245  | 6.56515  | 0.28281  |
| 5                    | 2.30308  | 5.54867  | 0.27096  |
| 6                    | 2.04253  | 4.65953  | 0.24435  |
| 7                    | 1.88189  | 4.02818  | 0.21125  |
| 8                    | 1.74185  | 3.67406  | 0.18438  |
| 9                    | 1.66481  | 3.21445  | 0.11875  |
| 10                   | 1.49129  | 2.94716  | 0.15951  |
| 11                   | 1.42416  | 2.68253  | 0.12803  |

<sup>a</sup>Fitting function

$$y = 0.5 * (\chi_1 - \chi_2) / \tan((1 - \alpha) * 1.5707) + \sqrt{((x - \chi_1) * (\chi_2 - x) + 0.25 * (\chi_2 - \chi_1)^2 / (\tan((1 - \alpha) * 1.5707))^2)}$$
